# Supplementary material for: Novel carbon allotropes in all-sp2 bonding networks: self-assembling design and first-principles calculations
Source: Royal Society of Chemistry journal article supplement (doi:10.1039/d3cp00823a), 2023-01-01
Supplement: d3cp00823a1.pdf [file d3cp00823a1.pdf]

## Supplementary materials

### **Novel carbon allotropes in all-sp<sup>2</sup> bonding networks: Self-assembling design and first-principles calculations**

Ying Ma,<sup>a</sup> Pan Ying,<sup>a,b,\*</sup> Kun Luo,<sup>a</sup> Yingju Wu,<sup>a,b</sup> Baozhong Li,<sup>a</sup> Qiaoyi Han,<sup>a</sup> and Julong He<sup>a,\*</sup>

<sup>a</sup>Center for High Pressure Science (CHiPS), State Key Laboratory of Metastable Materials Science and Technology, Yanshan University, Qinhuangdao, 066004, China

<sup>b</sup>Key Laboratory of Microstructural Material Physics of Hebei Province, School of Science, Yanshan University, Qinhuangdao 066004, China

\*E-mail: [hjl@ysu.edu.cn](mailto:hjl@ysu.edu.cn); [yingpan@ysu.edu.cn](mailto:yingpan@ysu.edu.cn)

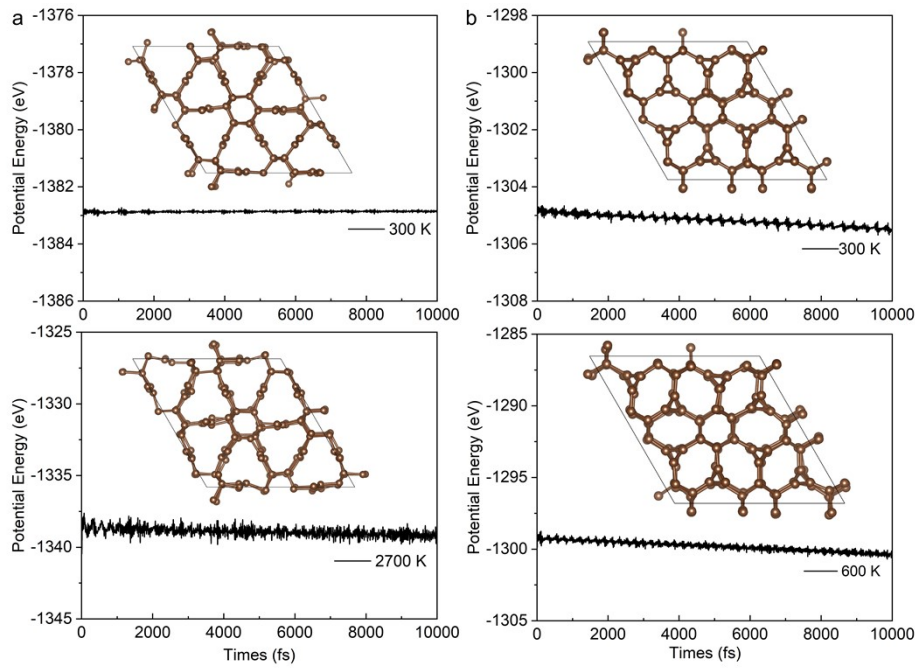

**Figure S1.** Total potential energy fluctuations of H61-carbon (a) and H62-carbon (b) during the MD simulations. The inset figures show the final structures after the MD simulations at different temperatures.

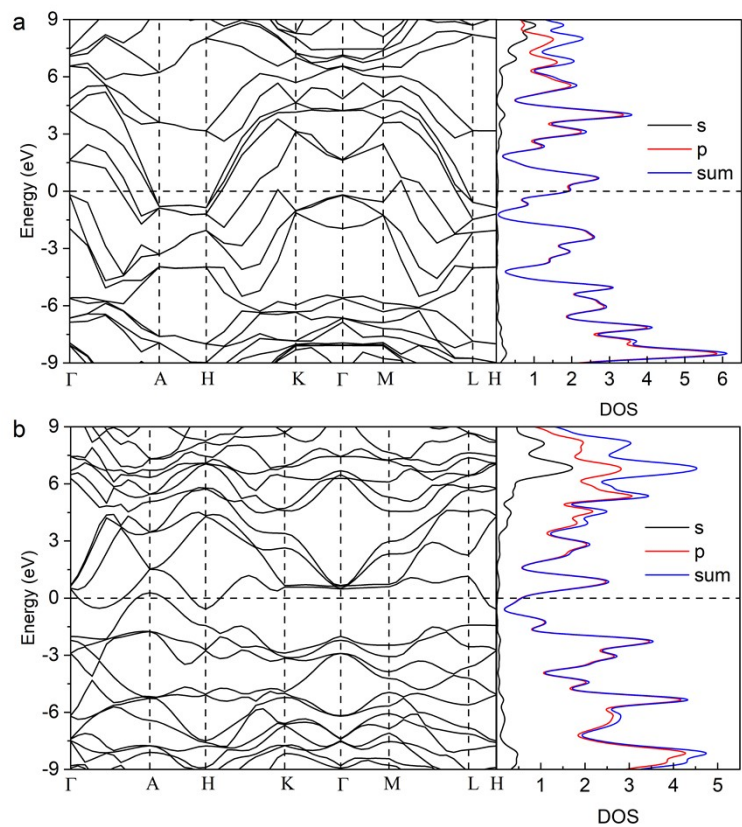

**Figure S2.** Electronic band structures and the density of states of H61-carbon (a) and H62-carbon (b) at ambient pressure using the HSE06.

**Table S1.** Calculated coulomb repulsion parameter  $\mu$ , electron–phonon coupling constant  $\lambda$ , The logarithmic average frequency  $\omega_{log}$ , and superconducting transition temperature  $T_c$  of  $H6^1$ -carbon and  $H6^2$ -carbon.

| $\mu$ | $H6^1$ -carbon |                |        | $H6^2$ -carbon |                |        |
|-------|----------------|----------------|--------|----------------|----------------|--------|
|       | $\lambda$      | $\omega_{log}$ | $T_c$  | $\lambda$      | $\omega_{log}$ | $T_c$  |
| 0.08  | 0.57176        | 503.923        | 12.338 | 0.47293        | 771.988        | 10.182 |
| 0.09  | 0.57176        | 503.923        | 11.094 | 0.47293        | 771.988        | 8.760  |
| 0.10  | 0.57176        | 503.923        | 9.911  | 0.47293        | 771.988        | 7.452  |
| 0.11  | 0.57176        | 503.923        | 8.790  | 0.47293        | 771.988        | 6.260  |
| 0.12  | 0.57176        | 503.923        | 7.734  | 0.47293        | 771.988        | 5.184  |
| 0.13  | 0.57176        | 503.923        | 6.746  | 0.47293        | 771.988        | 4.225  |
| 0.14  | 0.57176        | 503.923        | 5.827  | 0.47293        | 771.988        | 3.382  |
